# Supplementary material for: Sound exposure dynamically induces dopamine synthesis in cholinergic LOC efferents for feedback to auditory nerve fibers
Source: eLife. 2020 Jan 24;9:e52419. doi: 10.7554/eLife.52419 (PMC7043886; doi:10.7554/eLife.52419)
Supplement: Figure 4—source data 1. [file elife-52419-fig4-data1.xlsx]

## Sheet: exposed data
Subject	12 - M Rup			12 - M Rup			13 - F Rup			13 - F Rup			14 - M Lup			15 - F Lup			15 - F Lup			16 - F Rup			16 - F Rup			17 - M Lup			17 - M Lup			18 - M Rup			18 - M Rup			19 - F Ldn			19 - F Ldn			20 - F Rdn			20 - F Rdn
L/R Ear	L			R			L			R			R			L			R			L			R			L			R			L			R			L			R			L			R
Group	Exposed			Exposed			Exposed			Exposed			Exposed			Exposed			Exposed			Exposed			Exposed			Exposed			Exposed			Exposed			Exposed			Exposed			Exposed			Exposed			Exposed
D.O.B.	2016-09-06			2016-09-06			2016-10-18			2016-10-18			2016-10-18			2016-11-06			2016-11-06			2016-11-06			2016-11-06			2016-12-06			2016-12-06			2016-12-06			2016-12-06			2017-01-17			2017-01-17			2017-01-17			2017-01-17
Beginning and End of each TH+ terminal region (% from cochlear base)	23	27		20	22		32	45		20	23		6	9		11	36		87.5	100		28	33		18	23		21	32		18	39		20	42		16	68		23	40		54	67		20	25		18
	56	60		23	24		50	55		33	37		12	21		37.5	47					42	45		36	38		35	53		48	56		44	52		74	81		47	55		77	87.5		27	49		29
	63	67		25	30		57	68		39	40		23	39		49	62.5					47	50		39	41		54	59		61	65		56	71		84	100		58	73					62	65		40
	93	100		32	39		70	72		43	47		44	51		63	71					55	71		45	50		65	71		67	73		77	87.5					74	84					67	71		45
				40	45		87.5	100		53	58		53	66		85	91					72	79		59	68		76	80		77	79		89	100											72	81		70
				46	48					62.5	66		73	76											80	89		93	99		80	84														92	100		72
				55	66					70	73																				86	100																	76
				67	78																																												92
[truncated: 7 more columns]

## Sheet: control data
Subject	1 - M Ldn			1 - M Ldn			2 - F Lup			2 - F Lup			3 - M Ldn			3 - M Ldn			4 - F Ldn			4 - F Ldn			5 - F Rdn			5 - F Rdn			6 - M Ldn			6 - M Ldn			7 - M Rdn			7 - M Rdn			8 - F Lup			8 - F Lup			9 - F Rup
L/R Ear	L			R			L			R			L			R			L			R			L			R			L			R			L			R			L			R			L
Group	Control			Control			Control			Control			Control			Control			Control			Control			Control			Control			Control			Control			Control			Control			Control			Control			Control
D.O.B.	2016-09-06			2016-09-06			2016-10-18			2016-10-18			2016-10-18			2016-10-18			2016-11-06			2016-11-06			2016-11-06			2016-11-06			2016-12-06			2016-12-06			2016-12-06			2016-12-06			2017-01-17			2017-01-17			2017-01-17
Beginning and End of each TH+ terminal region (% from cochlear base)	87	90		91	100		71	74		89	92		92	100		96	100		83	100		90	100		87	90		84	100		77	86		94	99		1	16		1	16		10	14		87.5	100		87
	93	100					86	93		97	100														91	100					87.5	92					61	63		62.5	69		90	100					93
																															95	100					74	79		76	100
																																					99	100
[truncated: 11 more columns]
